# Supplementary material for: Same Exposure but Two Radically Different Responses to Antibiotics: Resilience of the Salivary Microbiome versus Long-Term Microbial Shifts in Feces
Source: PubMed Central journal article supplement — mBio. 2015 Nov 10;6(6):e01693-15. doi: 10.1128/mBio.01693-15 (PMC4659469; doi:10.1128/mbio.01693-15), 2015-11-10
Supplement: mbo005152533s1.pdf [file mbo005152533s1.pdf]

## 1 **Supplementary text: Materials and Methods**

### 2 *Clinical study protocol*

3 This randomized clinical trial involved two research centers – The Karolinska  
4 institute in Sweden, further referred to as KI, and Helperby Therapeutics Ltd in the  
5 United Kingdom, further referred to as HP. Each study was approved by the  
6 respective institutional boards, the respective national competent authorities and  
7 was registered to the European Union clinical Trials Register (KI: Clinical Trial  
8 Centre at the Karolinska University Hospital, MPA, EudraCT Number: 2010-  
9 023889-52; HP: The Wandsworth Research Ethics Committee; MHRA, EudraCT  
10 Number: 2009-017647-34). Each center involved healthy volunteers, randomized  
11 into two test groups and one control group.

12 At KI, 30 volunteers (15 males and 15 females, average age 26 years, range 18-45  
13 years) were randomly assigned to either the ciprofloxacin (Cipro), the clindamycin  
14 (Clinda) or the Placebo (Plac KI) group. The antibiotics (150 mg Clinda four times a  
15 day, 500 mg Cipro twice a day) and Placebo were administered for 10 days.

16 At HP, 44 volunteers (13 males, 31 females, average age 26 years, range 18-39 years)  
17 were randomly assigned to the amoxicillin (Amox, N=15), the minocycline (Minoc,  
18 N=15) or the Placebo (Plac HP, N=14) age and gender matched groups. The dosage  
19 used was that recommended by the British National Formulary for amoxicillin 250  
20 mg (Amoxil capsules, GlaxoSmithKline, UK) three times daily for seven days and  
21 minocycline 100 mg (Aknemin capsules, Almirall) twice daily for five days. Placebo  
22 was administered in two doses in 5 days.

23 Saliva and faecal samples were collected on 6 occasions: immediately before  
24 administration of the antibiotic (baseline), immediately after the treatment course  
25 was completed (week 1), 1 month, 2 months, 4 months and 12 months post-dosing.  
26 Samples were collected in sterile tubes and containers and were frozen at -70°C  
27 until processed.

#### 28 *Sample processing, 16S rRNA gene amplicon sequencing and data processing*

29 Frozen saliva samples were shipped to ACTA, Amsterdam, and faeces – to TNO,  
30 Zeist, both in the Netherlands, for sample processing for 16S rRNA gene amplicon  
31 sequencing. DNA was extracted as described previously (1).

32 Barcoded amplicon libraries of the small subunit ribosomal RNA gene  
33 hypervariable region V5-V7 were generated for each of the individual sample as  
34 described previously (2), pooled and sequenced by a Genome Sequencer FLX  
35 Titanium system (Roche, Basel, Switzerland). The sequencing data was processed  
36 using QIIME (Quantitative Insights Into Microbial Ecology)(3) version 1.5.0 as  
37 described previously (4). To allow comparisons among different samples, a  
38 randomly subsampled OTU-table at the lowest number of reads/sample was  
39 created (1730 reads/sample).

#### 40 *Metagenomic shotgun sequencing*

41 Metagenomic libraries were prepared from isolated DNA using the NEB DNA  
42 Mastermix Library Prep kit (New England Biolabs  
43 [https://www.neb.com/products/e6040-nebnext-dna-library-prep-master-mix-set-](https://www.neb.com/products/e6040-nebnext-dna-library-prep-master-mix-set-for-illumina)  
44 [for-illumina](https://www.neb.com/products/e6040-nebnext-dna-library-prep-master-mix-set-for-illumina)), with size selection by eGel (Life Technologies  
45 <https://www.lifetechnologies.com/order/catalog/product/G661002>). Libraries

46 were sequenced 250bp paired-end using the Illumina Miseq reagent kit V2 on an  
47 Illumina MiSeq.

48 After quality filtering with Trimmomatic (5), the paired and unpaired forward  
49 reads were combined and reads with more than 10% ambiguous bases were  
50 removed. Next, the reads were screened for human sequences with Best Match  
51 Tagger v3.101(6) after which human reads and duplicate reads were removed.  
52

53 *Metagenome prediction from 16S rRNA gene amplicon data and validation with*  
54 *shotgun data*

55 Microbial metagenomes were predicted from 16S rRNA gene sequences using  
56 PICRUSt (7) according to the pipeline at <http://picrust.github.io/picrust/>. In brief,  
57 the cleaned amplicon sequences were clustered into OTUs using the 'closed  
58 reference' OTU-picking protocol [QIIME 1.5.0] against the Greengenes database (8)  
59 v13.5, preclustered at 97% identity. The sequences from the 97% representative  
60 set were truncated to the V5-V7 region using TaxMan (5% mismatch, both primers  
61 removed) (9). Next, these sequences were clustered at 97% similarity using  
62 USEARCH v6.1.54 (10). After OTU picking, the OTU-table was randomly subsampled  
63 at 1730 reads/sample. The subsampled OTU-table was normalized by the  
64 known/predicted 16S rDNA copy number abundance using PICRUSt script  
65 `normalize_by_copy_number.py`. The metagenome functional predictions were  
66 created using the `predict_metagenomes.py` script. The obtained KEGG Pathway  
67 metadata was collapsed at the third (lowest) functional category level using  
68 `categorize_by_function.py` script.

69 The accuracy of PICRUSt predictions was compared with HUMANn (11) predictions  
70 based on the obtained metagenomic shotgun data. Shotgun data was searched  
71 against a reduced KEGG database (cf. HUMANn) using UBLAST from USEARCH  
72 v7.0.1090 (10) with a maximum of 20 hits and an E-value threshold of 1E-5.  
73 Shotgun data was not rarefied as to take all data into account for the calculation of  
74 the accuracy of PICRUSt predictions. The PICRUSt predicted KEGG Orthologs (KOs)  
75 and mapped shotgun reads were summarized with HUMANn to KEGG modules.  
76 Spearman's rank correlation coefficients between the PICRUSt and shotgun  
77 datasets were calculated for nine baseline samples (cor.test; R version 2.15.1).

78

#### 79 *Statistical analyses*

80 For the assessment of sample inter-relationships the subsampled OTU-table was  
81 mapped into an ordination by Principal Component Analysis in PAST software (12).  
82 The OTU-data was log-2 transformed before the ordination to normalize for highly  
83 abundant taxa. One-way PERMANOVA with Bray-Curtis similarity (13) and SIMPER  
84 with Bray-Curtis similarity, both in PAST, were used to assess the differences in  
85 microbiomes between groups. The diversity statistics (Shannon Diversity Index)  
86 was performed using PAST. Diversity index was compared using the General Lineal  
87 Model Repeated Measures (GLM RM) test (for related samples) and one-way  
88 ANOVA with the Games-Howell post-hoc test (for unrelated samples) in SPSS (SPSS,  
89 version 20.0). Bray-Curtis similarity between the microbiome profiles of the  
90 baseline and the other time point sample from the respective individual were  
91 calculated and the similarity of the respective visit pairs from different treatment  
92 groups were compared using one-way ANOVA with the Games-Howell post-hoc test.

93 Within each of the treatment groups, the similarity between the baseline visit and  
94 the last visit (month 12) was compared with the similarity of the baseline and each  
95 of the other visit pairs (baseline – week 1, baseline – month 1, baseline – month 2  
96 and baseline – month 4) using GLM RM test. The difference in predominant genera  
97 (present in at least 20% of samples) between the treatment and control groups was  
98 assessed using the Mann-Whitney test and corrected for multiple comparisons  
99 using Bonferroni correction.

100 Predicted metagenomes were analyzed using STAMP – Statistical Analysis of  
101 Taxonomic and Functional Profiles (14) software version 2.0.8. The relative  
102 frequencies of functional categories and KEGG ortholog groups (KO system) were  
103 compared between the sample groups using a two-sided Welch's t-test with the  
104 Welch's inverted CI method and Storey FDR correction for multiple comparisons.

105

106 References in the supplementary text:

- 107 1. **Zaura E, Keijsers B, Huse SM, Crielaard W.** 2009. Defining the healthy "core  
108 microbiome" of oral microbial communities. *BMC Microbiol* **9**:259.
- 109 2. **Kraneveld EA, Buijs MJ, Bonder MJ, Visser M, Keijsers BJ, Crielaard W, Zaura E.** 2012.  
110 The relation between oral *Candida* load and bacterial microbiome profiles in Dutch older  
111 adults. *PloS ONE* **7**:e42770.
- 112 3. **Caporaso JG, Kuczynski J, Stombaugh J, Bittinger K, Bushman FD, Costello EK,**  
113 **Fierer N, Pena AG, Goodrich JK, Gordon JI, Huttley GA, Kelley ST, Knights D, Koenig JE,**  
114 **Ley RE, Lozupone CA, McDonald D, Muegge BD, Pirrung M, Reeder J, Sevinsky JR,**  
115 **Turnbaugh PJ, Walters WA, Widmann J, Yatsunenko T, Zaneveld J, Knight R.** 2010.  
116 QIIME allows analysis of high-throughput community sequencing data. *Nature Meth* **7**:335-  
117 336.
- 118 4. **Koopman JE, Røling WFM, Buijs M, Sissons CH, ten Cate JM, Keijsers B, Crielaard**  
119 **W, Zaura E.** 2014. Stability and resilience of oral microcosms toward acidification and  
120 *Candida* outgrowth by arginine supplementation. *Microbial Ecology* doi:10.1007/s00248-  
121 014-0535-x:1-12.

122 5. **Bolger AM, Lohse M, Usadel B.** 2014. Trimmomatic: a flexible trimmer for Illumina  
123 sequence data. *Bioinformatics* **30**:2114-2120.

124 6. **Rotmistrovsky K, Agarwala R.** 2010. BMTagger: Best match tagger for removing  
125 human reads from metagenomics datasets.  
126 <ftp://ftp.ncbi.nlm.nih.gov/pub/agarwala/bmtagger/>

127 7. **Langille MGI, Zaneveld J, Caporaso JG, McDonald D, Knights D, Reyes JA, Clemente**  
128 **JC, Burkepille DE, Vega Thurber RL, Knight R, Beiko RG, Huttenhower C.** 2013.  
129 Predictive functional profiling of microbial communities using 16S rRNA marker gene  
130 sequences. *Nat Biotech* **31**:814-821.

131 8. **McDonald D, Price MN, Goodrich J, Nawrocki EP, DeSantis TZ, Probst A, Andersen**  
132 **GL, Knight R, Hugenholtz P.** 2012. An improved Greengenes taxonomy with explicit ranks  
133 for ecological and evolutionary analyses of bacteria and archaea. *ISME J* **6**:610-618.

134 9. **Brandt BW, Bonder MJ, Huse SM, Zaura E.** 2012. TaxMan: a server to trim rRNA  
135 reference databases and inspect taxonomic coverage. *Nucleic Acids Res.* **40**(W1):W82-W87.  
136 doi:10.1093/nar/gks418.

137 10. **Edgar RC.** 2010. Search and clustering orders of magnitude faster than BLAST.  
138 *Bioinform* **26**:2460-2461.

139 11. **Abubucker S, Segata N, Goll J, Schubert AM, Izard J, Cantarel BL, Rodriguez-**  
140 **Mueller B, Zucker J, Thiagarajan M, Henrissat B, White O, Kelley ST, Methé B, Schloss**  
141 **PD, Gevers D, Mitreva M, Huttenhower C.** 2012. Metabolic Reconstruction for  
142 Metagenomic Data and Its Application to the Human Microbiome. *PLoS Comput Biol*  
143 **8**:e1002358.

144 12. **Hammer O, Harper DAT, Ryan PD.** 2001. PAST: Paleontological statistics  
145 software package for education and data analysis *Palaeontol Electr* **4**:1-9.

146 13. **Clarke KR.** 1993. Non-parametric multivariate analyses of changes in  
147 community structure. *Australian Journal of Ecology* **18**:117-143.

148 14. **Parks DH, Tyson GW, Hugenholtz P, Beiko RG.** 2014. STAMP: statistical  
149 analysis of taxonomic and functional profiles. *Bioinformatics* **30**:3123-3124.

150
