# Supplementary material for: Same Exposure but Two Radically Different Responses to Antibiotics: Resilience of the Salivary Microbiome versus Long-Term Microbial Shifts in Feces
Source: PubMed Central journal article supplement — mBio. 2015 Nov 10;6(6):e01693-15. doi: 10.1128/mBio.01693-15 (PMC4659469; doi:10.1128/mbio.01693-15), 2015-11-10
Supplement: mbo005152533sf1.pdf [file mbo005152533sf1.pdf]

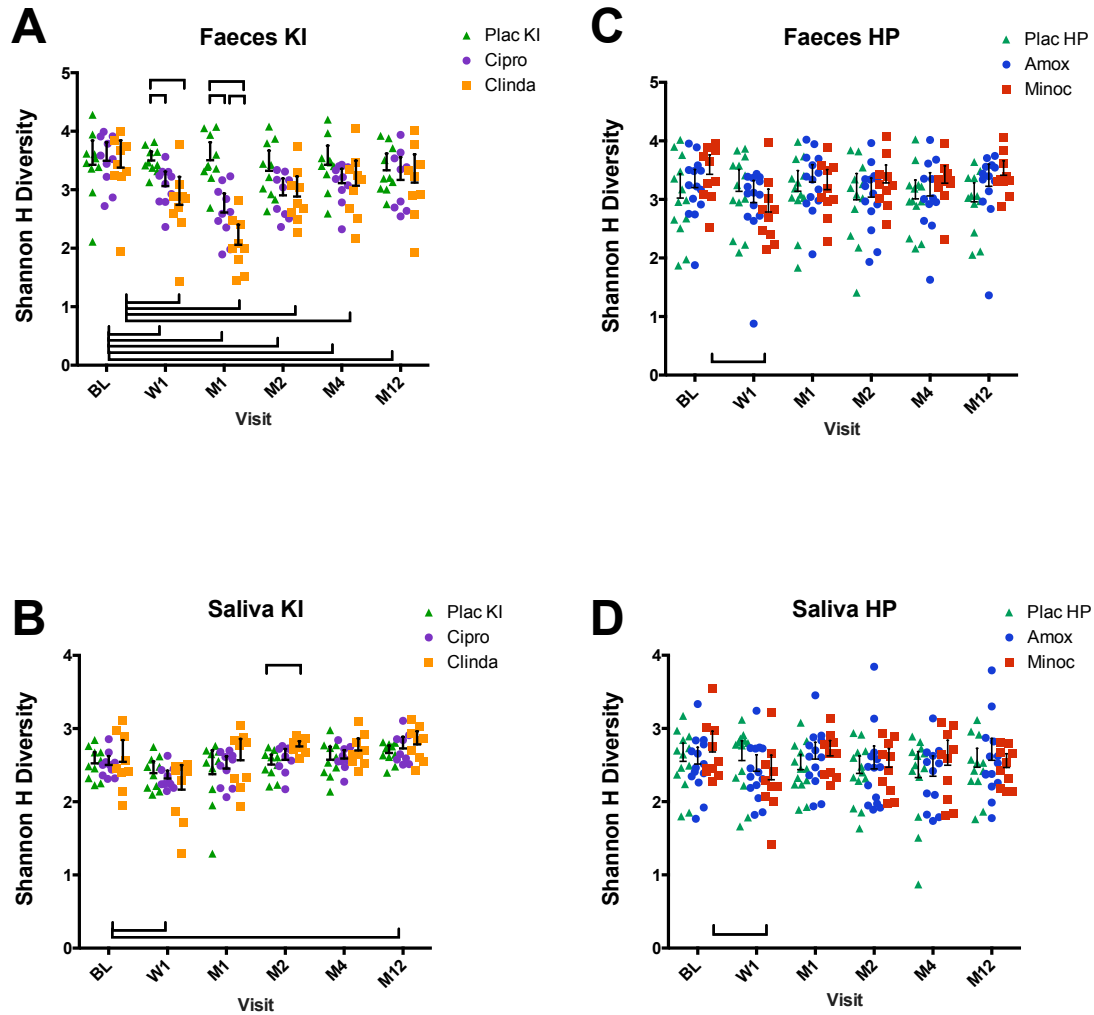

**Figure S1.** Diversity (Shannon H Diversity Index) of microbiome profiles per sample type (Faeces, Saliva), study site (KI, HP) and treatment in time (BL – baseline, W1 – week 1, M1 – month 1, M2 – month 2, M4 – month 4, M12 – month 12). The horizontal mark indicates the mean value, error bar – 95% CI. Connectors above the data points connect statistically significantly different groups within the respective timepoint ( $p < 0.05$ ; One-way ANOVA; Games-Howell post-hoc test). Connectors below the data points connect the samples within one treatment at the time points that differed significantly from the baseline ( $p < 0.05$ ; General Linear Model Repeated Measures test).
