# Supplementary material for: Same Exposure but Two Radically Different Responses to Antibiotics: Resilience of the Salivary Microbiome versus Long-Term Microbial Shifts in Feces
Source: PubMed Central journal article supplement — mBio. 2015 Nov 10;6(6):e01693-15. doi: 10.1128/mBio.01693-15 (PMC4659469; doi:10.1128/mbio.01693-15), 2015-11-10
Supplement: mbo005152533sf2.pdf [file mbo005152533sf2.pdf]

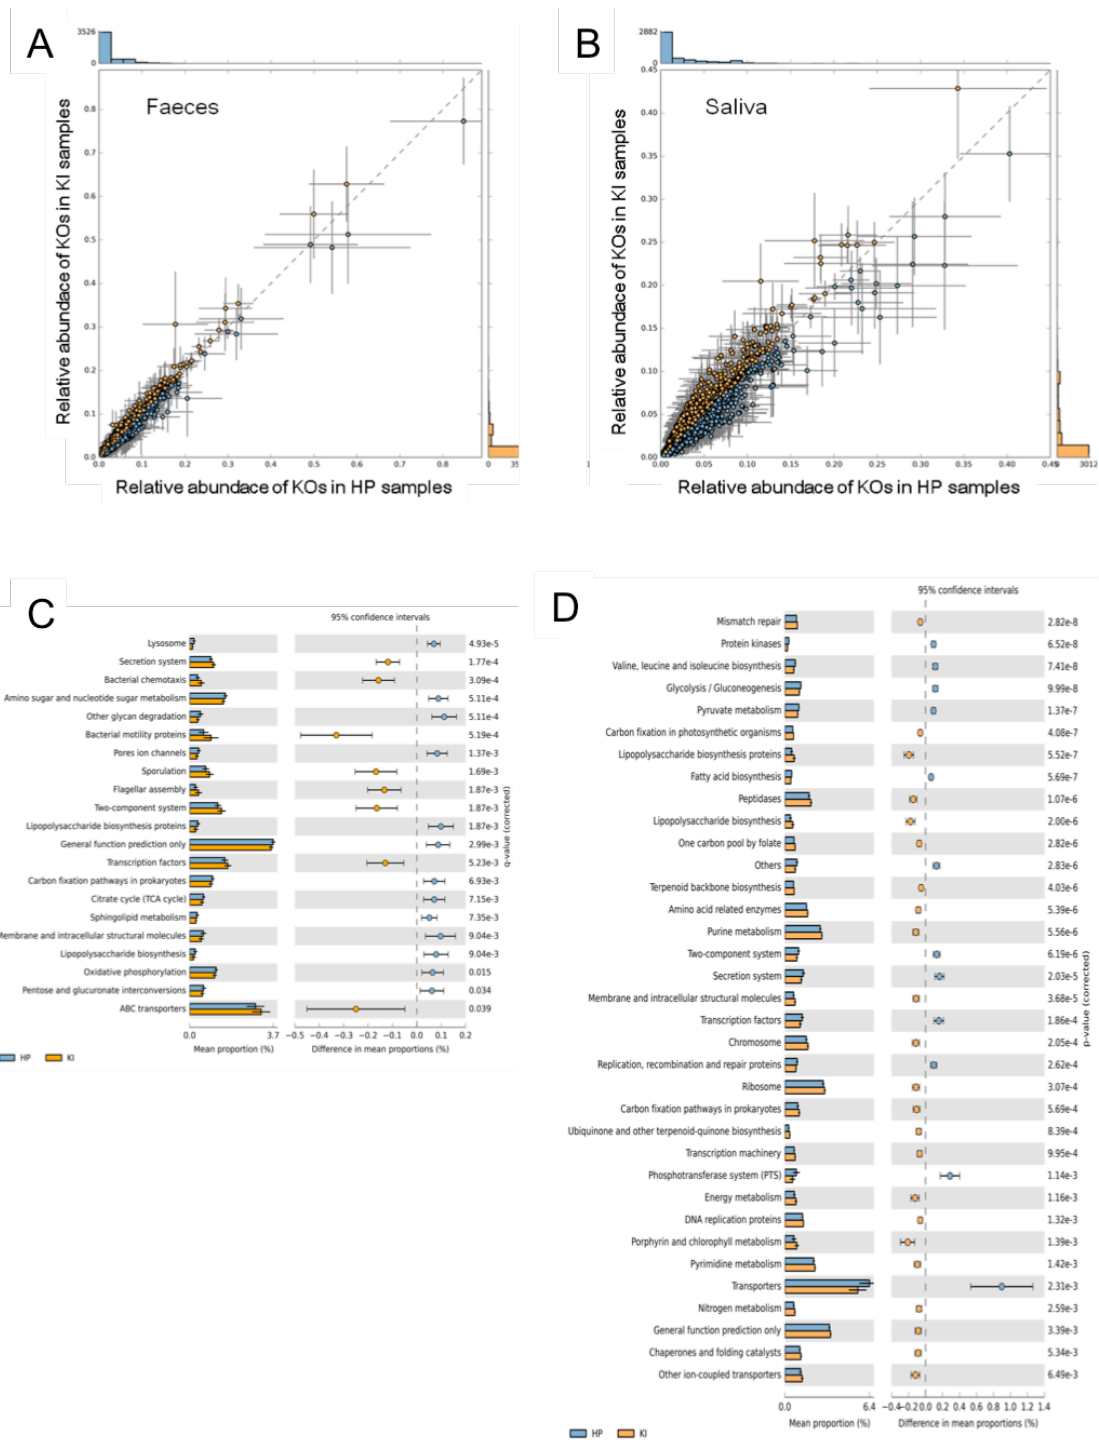

**Figure S2.** Relative abundance of the predicted KEGG Orthologous groups (KOs) at baseline (error lines indicate standard deviation) in faeces (A) and in saliva (B) from the two centers – KI and HP and the most abundant significantly differently predicted functional groups (L3) in the faecal (C) and salivary (D) baseline samples from the two study sites, HP (N=37) and KI (N=29).
