# Supplementary material for: Same Exposure but Two Radically Different Responses to Antibiotics: Resilience of the Salivary Microbiome versus Long-Term Microbial Shifts in Feces
Source: PubMed Central journal article supplement — mBio. 2015 Nov 10;6(6):e01693-15. doi: 10.1128/mBio.01693-15 (PMC4659469; doi:10.1128/mbio.01693-15), 2015-11-10
Supplement: mbo005152533sf3.pdf [file mbo005152533sf3.pdf]

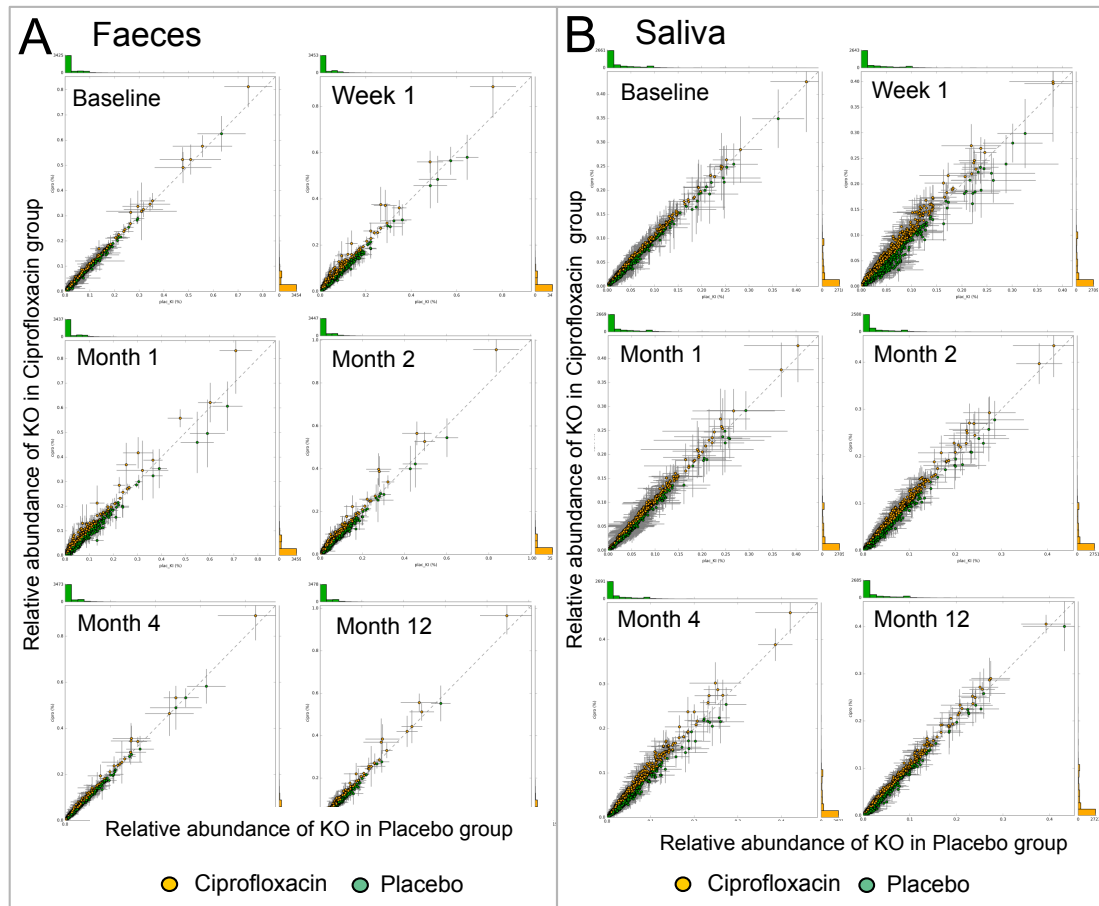

**Figure S3.** Relative abundance of the predicted KEGG Orthologous groups (KOs) in the faecal (A) and in the salivary (B) samples from the ciprofloxacin group plotted against the samples from the KI placebo group per individual time point. Error lines indicate standard deviation. In saliva, 1 week post-antibiotics 310 KOs, and in faeces, 1 month post-antibiotics 612 of the 4606 predicted KOs were significantly different in their proportions from the placebo group ( $p < 0.005$ , Welch's t-test, Welch's inverted CI method, Storey FDR correction for multiple comparisons).
