# Supplementary material for: Same Exposure but Two Radically Different Responses to Antibiotics: Resilience of the Salivary Microbiome versus Long-Term Microbial Shifts in Feces
Source: PubMed Central journal article supplement — mBio. 2015 Nov 10;6(6):e01693-15. doi: 10.1128/mBio.01693-15 (PMC4659469; doi:10.1128/mbio.01693-15), 2015-11-10
Supplement: mbo005152533sf4.pdf [file mbo005152533sf4.pdf]

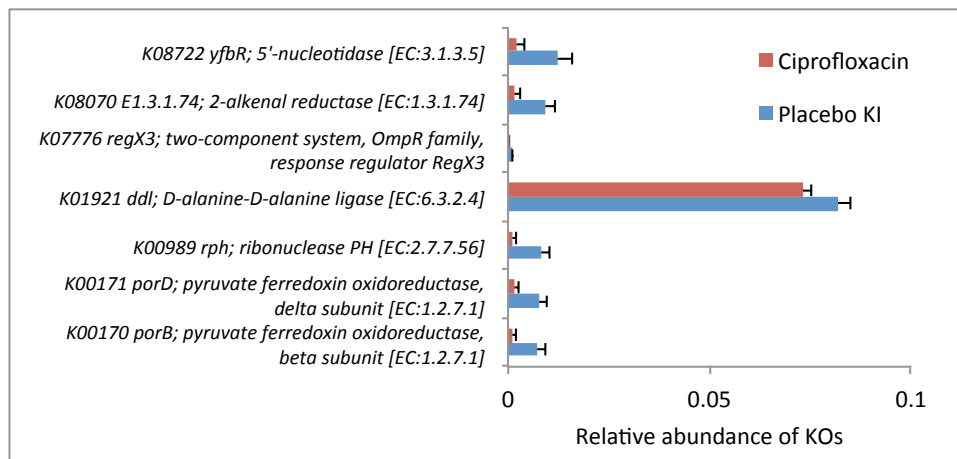

**Figure S4.** Most significantly affected KOs (7 of 612) in predicted metagenomes from ciprofloxacin-exposed faeces at month 1 compared to the respective placebo group samples.
