# Supplementary material for: Same Exposure but Two Radically Different Responses to Antibiotics: Resilience of the Salivary Microbiome versus Long-Term Microbial Shifts in Feces
Source: PubMed Central journal article supplement — mBio. 2015 Nov 10;6(6):e01693-15. doi: 10.1128/mBio.01693-15 (PMC4659469; doi:10.1128/mbio.01693-15), 2015-11-10
Supplement: mbo005152533st2.pdf [file mbo005152533st2.pdf]

**Table S2.** Effects of different antibiotics on taxa in the salivary microbiome. Only genera or higher taxon present in at least 20% of the samples are shown. The colored cells indicate the time points at which a significant difference in the relative abundance of the taxon was observed in the antibiotic group compared to the respective placebo group. Red – decrease, green – increase compared to the placebo (Mann-Whitney test,  $p < 0.005$ ). Only taxa in the dark-colored cells remained significant after Bonferroni correction for multiple comparisons. BL – baseline, W1 – week 1, M1 – month 1, M2 – month 2, M4 – month 4, M12 – month 12. Mean - average relative abundance of each taxon per study.

| Taxon                                                                           | KI study                                                                      |    |    |    |    |             |    |    |    |    | HP study    |    |    |    |             |    |    |    | Mean (%) |    |    |       |       |       |
|---------------------------------------------------------------------------------|-------------------------------------------------------------------------------|----|----|----|----|-------------|----|----|----|----|-------------|----|----|----|-------------|----|----|----|----------|----|----|-------|-------|-------|
|                                                                                 | Ciprofloxacin                                                                 |    |    |    |    | Clindamycin |    |    |    |    | Amoxicillin |    |    |    | Minocycline |    |    |    | KI       | HP |    |       |       |       |
|                                                                                 | BL                                                                            | W1 | M1 | M2 | M4 | BL          | W1 | M1 | M2 | M4 | BL          | W1 | M1 | M2 | M4          | BL | W1 | M1 |          |    | M2 | M4    | M12   |       |
| Actinobacteria                                                                  | Actinobacteria;Actinomycetales;Actinomycetaceae;Actinobaculum                 |    |    |    |    |             |    |    |    |    |             |    |    |    |             |    |    |    |          |    |    |       | 0.02  | 0.02  |
|                                                                                 | Actinobacteria;Actinomycetales;Actinomycetaceae;Actinomyces                   |    |    |    |    |             |    |    |    |    |             |    |    |    |             |    |    |    |          |    |    |       | 2.89  | 2.78  |
|                                                                                 | Actinobacteria;Corynebacteriales;Corynebacteriaceae;Corynebacterium           |    |    |    |    |             |    |    |    |    |             |    |    |    |             |    |    |    |          |    |    |       | 0.09  | 0.22  |
|                                                                                 | Actinobacteria;Micrococcales;Micrococcaceae;Rothia                            |    |    |    |    |             |    |    |    |    |             |    |    |    |             |    |    |    |          |    |    |       | 2.00  | 8.23  |
|                                                                                 | Actinobacteria;Micrococcales;Other;Other                                      |    |    |    |    |             |    |    |    |    |             |    |    |    |             |    |    |    |          |    |    |       | 0.05  | 0.21  |
|                                                                                 | Coriobacteria;Coriobacteriales;Coriobacteriaceae;Atopobium                    |    |    |    |    |             |    |    |    |    |             |    |    |    |             |    |    |    |          |    |    |       | 0.13  | 0.17  |
| Bacteroidetes                                                                   | Bacteroidia;Bacteroidales;Porphyromonadaceae;Paludibacter                     |    |    |    |    |             |    |    |    |    |             |    |    |    |             |    |    |    |          |    |    |       | 0.02  | 0.06  |
|                                                                                 | Bacteroidia;Bacteroidales;Porphyromonadaceae;Porphyromonas                    |    |    |    |    |             |    |    |    |    |             |    |    |    |             |    |    |    |          |    |    |       | 2.3   | 2.3   |
|                                                                                 | Bacteroidia;Bacteroidales;Porphyromonadaceae;Tannerella                       |    |    |    |    |             |    |    |    |    |             |    |    |    |             |    |    |    |          |    |    |       | 0.04  | 0.1   |
|                                                                                 | Bacteroidia;Bacteroidales;Prevotellaceae;Other                                |    |    |    |    |             |    |    |    |    |             |    |    |    |             |    |    |    |          |    |    |       | 0.05  | 0.06  |
|                                                                                 | Bacteroidia;Bacteroidales;Prevotellaceae;Prevotella                           |    |    |    |    |             |    |    |    |    |             |    |    |    |             |    |    |    |          |    |    |       | 36.19 | 17.77 |
|                                                                                 | Bacteroidia;Bacteroidales;Prevotellaceae;Xylanibacter                         |    |    |    |    |             |    |    |    |    |             |    |    |    |             |    |    |    |          |    |    |       | 0.00  | 0.08  |
|                                                                                 | Bacteroidia;Bacteroidales;Rikenellaceae;Rc9_gut_group                         |    |    |    |    |             |    |    |    |    |             |    |    |    |             |    |    |    |          |    |    |       | 0.02  | 0.02  |
|                                                                                 | Flavobacteria;Flavobacteriales;Flavobacteriaceae;Bergeyella                   |    |    |    |    |             |    |    |    |    |             |    |    |    |             |    |    |    |          |    |    |       | 0.25  | 0.48  |
|                                                                                 | Flavobacteria;Flavobacteriales;Flavobacteriaceae;Capnocytophaga               |    |    |    |    |             |    |    |    |    |             |    |    |    |             |    |    |    |          |    |    |       | 0.3   | 0.7   |
|                                                                                 | Candidate_division_sr1;Uncultured_bacterium_x112                              |    |    |    |    |             |    |    |    |    |             |    |    |    |             |    |    |    |          |    |    |       | 0.1   | 0.08  |
| TM7                                                                             | Candidate_division_tm7;Tm7_phylum_sp_oral_clone_cw040                         |    |    |    |    |             |    |    |    |    |             |    |    |    |             |    |    |    |          |    |    |       | 0.1   | 0.06  |
|                                                                                 | Candidate_division_tm7;Tm7_phylum_sp_oral_clone_dr034                         |    |    |    |    |             |    |    |    |    |             |    |    |    |             |    |    |    |          |    |    |       | 0.29  | 0.32  |
|                                                                                 | Candidate_division_tm7;Tm7_phylum_sp_oral_clone_fr058                         |    |    |    |    |             |    |    |    |    |             |    |    |    |             |    |    |    |          |    |    |       | 0.08  | 0.11  |
|                                                                                 | Candidate_division_tm7;Uncultured_candidate_division_tm7_bacterium            |    |    |    |    |             |    |    |    |    |             |    |    |    |             |    |    |    |          |    |    |       | 0.01  | 0.07  |
| Firmicutes                                                                      | Firmicutes;Bacilli;Bacillales;Family_xi_incertae_sedis;Gemella                |    |    |    |    |             |    |    |    |    |             |    |    |    |             |    |    |    |          |    |    |       | 1.00  | 1.54  |
|                                                                                 | Firmicutes;Bacilli;Lactobacillales;Aerococcaceae;Abiotrophia                  |    |    |    |    |             |    |    |    |    |             |    |    |    |             |    |    |    |          |    |    |       | 0.03  | 0.07  |
|                                                                                 | Firmicutes;Bacilli;Lactobacillales;Streptococcaceae;Streptococcus             |    |    |    |    |             |    |    |    |    |             |    |    |    |             |    |    |    |          |    |    |       | 17.2  | 29.31 |
|                                                                                 | Firmicutes;Clostridia;Clostridiales;Family_xi_incertae_sedis;Parvimonas       |    |    |    |    |             |    |    |    |    |             |    |    |    |             |    |    |    |          |    |    |       | 0.1   | 0.19  |
|                                                                                 | Firmicutes;Clostridia;Clostridiales;Family_xiii_incertae_sedis;Incertae_sedis |    |    |    |    |             |    |    |    |    |             |    |    |    |             |    |    |    |          |    |    |       | 0.23  | 0.24  |
|                                                                                 | Firmicutes;Clostridia;Clostridiales;Family_xiii_incertae_sedis;Mogibacterium  |    |    |    |    |             |    |    |    |    |             |    |    |    |             |    |    |    |          |    |    |       | 0.09  | 0.09  |
|                                                                                 | Firmicutes;Clostridia;Clostridiales;Lachnospiraceae;Butyrivibrio              |    |    |    |    |             |    |    |    |    |             |    |    |    |             |    |    |    |          |    |    |       | 0.03  | 0.02  |
|                                                                                 | Firmicutes;Clostridia;Clostridiales;Lachnospiraceae;Catonella                 |    |    |    |    |             |    |    |    |    |             |    |    |    |             |    |    |    |          |    |    |       | 0.12  | 0.14  |
|                                                                                 | Firmicutes;Clostridia;Clostridiales;Lachnospiraceae;Johnsonella               |    |    |    |    |             |    |    |    |    |             |    |    |    |             |    |    |    |          |    |    |       | 0.45  | 0.43  |
|                                                                                 | Firmicutes;Clostridia;Clostridiales;Lachnospiraceae;Moryella                  |    |    |    |    |             |    |    |    |    |             |    |    |    |             |    |    |    |          |    |    |       | 0.15  | 0.15  |
|                                                                                 | Firmicutes;Clostridia;Clostridiales;Lachnospiraceae;Oribacterium              |    |    |    |    |             |    |    |    |    |             |    |    |    |             |    |    |    |          |    |    |       | 0.80  | 0.73  |
|                                                                                 | Firmicutes;Clostridia;Clostridiales;Lachnospiraceae;Shuttleworthia            |    |    |    |    |             |    |    |    |    |             |    |    |    |             |    |    |    |          |    |    |       | 0.01  | 0.02  |
|                                                                                 | Firmicutes;Clostridia;Clostridiales;Peptostreptococcaceae;Fillifactor         |    |    |    |    |             |    |    |    |    |             |    |    |    |             |    |    |    |          |    |    |       | 0.01  | 0.11  |
|                                                                                 | Firmicutes;Clostridia;Clostridiales;Peptostreptococcaceae;Incertae_sedis      |    |    |    |    |             |    |    |    |    |             |    |    |    |             |    |    |    |          |    |    |       | 0.01  | 0.03  |
|                                                                                 | Firmicutes;Clostridia;Clostridiales;Peptostreptococcaceae;Peptostreptococcus  |    |    |    |    |             |    |    |    |    |             |    |    |    |             |    |    |    |          |    |    |       | 0.14  | 0.10  |
|                                                                                 | Firmicutes;Clostridia;Clostridiales;Ruminococcaceae;Uncultured                |    |    |    |    |             |    |    |    |    |             |    |    |    |             |    |    |    |          |    |    |       | 0.13  | 0.16  |
|                                                                                 | Firmicutes;Clostridia;Clostridiales;Veillonellaceae;Dialister                 |    |    |    |    |             |    |    |    |    |             |    |    |    |             |    |    |    |          |    |    |       | 0.05  | 0.10  |
|                                                                                 | Firmicutes;Clostridia;Clostridiales;Veillonellaceae;Megasphaera               |    |    |    |    |             |    |    |    |    |             |    |    |    |             |    |    |    |          |    |    |       | 0.62  | 0.67  |
|                                                                                 | Firmicutes;Clostridia;Clostridiales;Veillonellaceae;Other                     |    |    |    |    |             |    |    |    |    |             |    |    |    |             |    |    |    |          |    |    |       | 0.65  | 0.32  |
|                                                                                 | Firmicutes;Clostridia;Clostridiales;Veillonellaceae;Selenomonas               |    |    |    |    |             |    |    |    |    |             |    |    |    |             |    |    |    |          |    |    |       | 0.0   | 0.08  |
| Firmicutes;Clostridia;Clostridiales;Veillonellaceae;Veillonella                 |                                                                               |    |    |    |    |             |    |    |    |    |             |    |    |    |             |    |    |    |          |    |    | 15.99 | 12.38 |       |
| Firmicutes;Erysipelotrichi;Erysipelotrichales;Erysipelotrichaceae;Solobacterium |                                                                               |    |    |    |    |             |    |    |    |    |             |    |    |    |             |    |    |    |          |    |    | 0.24  | 0.29  |       |
| Fusobacteria                                                                    | Fusobacteria;Fusobacteriales;Fusobacteriaceae;Fusobacterium                   |    |    |    |    |             |    |    |    |    |             |    |    |    |             |    |    |    |          |    |    |       | 1.41  | 1.57  |
|                                                                                 | Fusobacteria;Fusobacteriales;Leptotrichiaceae;Leptotrichia                    |    |    |    |    |             |    |    |    |    |             |    |    |    |             |    |    |    |          |    |    |       | 1.21  | 1.36  |
|                                                                                 | Fusobacteria;Fusobacteriales;Leptotrichiaceae;Uncultured                      |    |    |    |    |             |    |    |    |    |             |    |    |    |             |    |    |    |          |    |    |       | 0.00  | 0.06  |
| Proteobacteria                                                                  | Betaproteobacteria;Burkholderiales;Alcaligenaceae;Derxia                      |    |    |    |    |             |    |    |    |    |             |    |    |    |             |    |    |    |          |    |    |       | 0.05  | 0.20  |
|                                                                                 | Betaproteobacteria;Neisseriales;Neisseriaceae;Neisseria                       |    |    |    |    |             |    |    |    |    |             |    |    |    |             |    |    |    |          |    |    |       | 5.17  | 9.40  |
|                                                                                 | Epsilonproteobacteria;Campylobacteriales;Campylobacteraceae;Campylobacter     |    |    |    |    |             |    |    |    |    |             |    |    |    |             |    |    |    |          |    |    |       | 0.37  | 0.28  |
|                                                                                 | Gammaproteobacteria;Cardiobacteriales;Cardiobacteriaceae;Cardiobacterium      |    |    |    |    |             |    |    |    |    |             |    |    |    |             |    |    |    |          |    |    |       | 0.02  | 0.06  |
|                                                                                 | Gammaproteobacteria;Pasteurellales;Pasteurellaceae;Actinobacillus             |    |    |    |    |             |    |    |    |    |             |    |    |    |             |    |    |    |          |    |    |       | 1.59  | 0.82  |
|                                                                                 | Gammaproteobacteria;Pasteurellales;Pasteurellaceae;Haemophilus                |    |    |    |    |             |    |    |    |    |             |    |    |    |             |    |    |    |          |    |    |       | 6.78  | 4.09  |
| Spirochaetes;Spirochaetales;Spirochaetaceae;Treponema                           |                                                                               |    |    |    |    |             |    |    |    |    |             |    |    |    |             |    |    |    |          |    |    | 0.06  | 0.19  |       |
| Tenericutes;Mollicutes;Mycoplasmatales;Mycoplasmataceae;Mycoplasma              |                                                                               |    |    |    |    |             |    |    |    |    |             |    |    |    |             |    |    |    |          |    |    | 0.01  | 0.06  |       |
| Unclassified Bacteria                                                           |                                                                               |    |    |    |    |             |    |    |    |    |             |    |    |    |             |    |    |    |          |    |    | 0.02  | 0.13  |       |
