# Supplementary material for: Same Exposure but Two Radically Different Responses to Antibiotics: Resilience of the Salivary Microbiome versus Long-Term Microbial Shifts in Feces
Source: PubMed Central journal article supplement — mBio. 2015 Nov 10;6(6):e01693-15. doi: 10.1128/mBio.01693-15 (PMC4659469; doi:10.1128/mbio.01693-15), 2015-11-10
Supplement: mbo005152533st3.pdf [file mbo005152533st3.pdf]

**Table S3.** Predicted KOs that are associated with multidrug or antibiotic resistance and that were found in significantly different proportions in both, faecal and salivary baseline samples between the two study sites – KI and HP.

| Sample | KO ID  | Function                                                                                                                                                                                                           | Center | P value* |
|--------|--------|--------------------------------------------------------------------------------------------------------------------------------------------------------------------------------------------------------------------|--------|----------|
| Faeces | K03297 | <i>TC.SMR, emr, small multidrug resistance family protein</i>                                                                                                                                                      | HP     | 0.0001   |
|        | K03327 | <i>TC.MATE, SLC47A, norM, mdtK, dinF, multidrug resistance protein, MATE family</i>                                                                                                                                | HP     | 0.026    |
|        | K03577 | <i>acrR, smeT, TetR/AcrR family transcriptional regulator, acrAB operon repressor, M00647 Multidrug resistance, efflux pump MexAB-OprM/SmeDEF/AcrAB-TolC</i>                                                       | HP     | <0.0001  |
|        | K03585 | <i>acrA, mexA, adel, smeD, membrane fusion protein, ko00312 beta-Lactam resistance, M00646 Multidrug resistance, efflux pump AcrAD-TolC; M00647 Multidrug resistance, efflux pump MexAB-OprM/SmeDEF/AcrAB-TolC</i> | HP     | 0.007    |
|        | K03587 | <i>ftsI, cell division protein FtsI (penicillin-binding protein 3), ko00312 beta-Lactam resistance, M00626 beta-Lactam resistance, penicillin-binding protein variants</i>                                         | HP     | 0.023    |
|        | K03712 | <i>marR, MarR family transcriptional regulator, multiple antibiotic resistance protein MarR</i>                                                                                                                    | KI     | 0.002    |
|        | K05515 | <i>mrda, penicillin-binding protein 2, ko00312 beta-Lactam resistance, M00626 beta-Lactam resistance, penicillin-binding protein variants</i>                                                                      | HP     | 0.0002   |
|        | K05595 | <i>marC, multiple antibiotic resistance protein</i>                                                                                                                                                                | HP     | 0.013    |
|        | K08641 | <i>vanX, D-alanyl-D-alanine dipeptidase [EC:3.4.13.22], ko02020 Two-component system, M00651 Vancomycin resistance, VanB type</i>                                                                                  | HP     | 0.035    |

|        |        |                                                                                                                                                                                                                                                              |    |         |
|--------|--------|--------------------------------------------------------------------------------------------------------------------------------------------------------------------------------------------------------------------------------------------------------------|----|---------|
|        | K12340 | <i>tolC</i> , outer membrane channel protein, ko00312 beta-Lactam resistance, M00325 alpha-Hemolysin/cyclolysin transport system, M00646 Multidrug resistance, efflux pump AcrAD-TolC, M00647 Multidrug resistance, efflux pump MexAB-OprM/SmeDEF/AcrAB-TolC | HP | 0.019   |
| Saliva | K00012 | <i>UGDH</i> , <i>ugd</i> , UDPglucose 6-dehydrogenase [EC:1.1.1.22], M00671 Polycationic antibiotics resistance operon lipopolysaccharide (LPS) modification operon                                                                                          | KI | <0.0001 |
|        | K00687 | <i>pbp2B</i> , <i>penA</i> , penicillin-binding protein 2B [EC:2.3.2.-], ko00312 beta-Lactam resistance, M00626 beta-Lactam resistance, penicillin-binding protein variants                                                                                  | HP | <0.0001 |
|        | K03543 | <i>emrA</i> , multidrug resistance protein A                                                                                                                                                                                                                 | HP | 0.008   |
|        | K03577 | <i>acrR</i> , <i>smeT</i> , TetR/AcrR family transcriptional regulator, <i>acrAB</i> operon repressor, M00647 Multidrug resistance, efflux pump MexAB-OprM/SmeDEF/AcrAB-TolC                                                                                 | HP | 0.003   |
|        | K03585 | <i>acrA</i> , <i>mexA</i> , <i>adel</i> , <i>smeD</i> , membrane fusion protein, ko00312 beta-Lactam resistance, M00646 Multidrug resistance, efflux pump AcrAD-TolC, M00647 Multidrug resistance, efflux pump MexAB-OprM/SmeDEF/AcrAB-TolC                  | KI | <0.0001 |
|        | K03587 | <i>ftsI</i> , cell division protein FtsI (penicillin-binding protein 3), ko00312 beta-Lactam resistance, M00626 beta-Lactam resistance, penicillin-binding protein variants                                                                                  | KI | <0.0001 |
|        | K03693 | <i>pbp</i> , penicillin-binding protein, ko00312 beta-Lactam resistance                                                                                                                                                                                      | HP | 0.0001  |
|        | K05366 | <i>mrcA</i> , penicillin-binding protein 1A [EC:2.4.1.- 3.4.-.-], ko00312 beta-Lactam resistance, M00626 beta-Lactam resistance, penicillin-binding protein variants                                                                                         | KI | <0.0001 |
|        | K05367 | <i>pbpC</i> , penicillin-binding protein 1C [EC:2.4.1.-], ko00550 Peptidoglycan biosynthesis                                                                                                                                                                 | HP | 0.031   |
|        | K05515 | <i>mrDA</i> , <i>mrDA</i> , penicillin-binding protein 2,                                                                                                                                                                                                    | KI | <0.0001 |

|        |  |                                                                                                                                                                                  |    |         |
|--------|--|----------------------------------------------------------------------------------------------------------------------------------------------------------------------------------|----|---------|
|        |  | <i>ko00312 beta-Lactam resistance,</i><br><i>M00626 beta-Lactam resistance, penicillin-binding protein variants</i>                                                              |    |         |
| K07260 |  | <i>vanY, D-alanyl-D-alanine carboxypeptidase [EC:3.4.16.4]</i><br><i>ko00550 Peptidoglycan biosynthesis, ko02020 Two-component system</i>                                        | HP | <0.0001 |
| K07552 |  | <i>bcr, MFS transporter, DHA1 family, bicyclomycin/chloramphenicol resistance protein</i>                                                                                        | KI | 0.010   |
| K08161 |  | <i>mdtG, MFS transporter, DHA1 family, multidrug resistance protein</i>                                                                                                          | KI | <0.0001 |
| K08218 |  | <i>ampG, MFS transporter, PAT family, beta-lactamase induction signal transducer AmpG,</i><br><i>ko00312 beta-Lactam resistance</i>                                              | KI | <0.0001 |
| K12555 |  | <i>pbp2A, penicillin-binding protein 2A [EC:2.4.1.129 2.3.2.-]</i><br><i>ko00312 beta-Lactam resistance, M00626 beta-Lactam resistance, penicillin-binding protein variants</i>  | HP | <0.0001 |
| K12556 |  | <i>pbp2X, penicillin-binding protein 2X [EC:2.3.2.-],</i><br><i>ko00312 beta-Lactam resistance,</i><br><i>M00626 beta-Lactam resistance, penicillin-binding protein variants</i> | HP | <0.0001 |

\* - P value after Storey FDR correction for multiple comparisons
