# Supplementary material for: Same Exposure but Two Radically Different Responses to Antibiotics: Resilience of the Salivary Microbiome versus Long-Term Microbial Shifts in Feces
Source: PubMed Central journal article supplement — mBio. 2015 Nov 10;6(6):e01693-15. doi: 10.1128/mBio.01693-15 (PMC4659469; doi:10.1128/mbio.01693-15), 2015-11-10
Supplement: mbo005152533st4.pdf [file mbo005152533st4.pdf]

**Table S4.** Predicted KOs associated with multidrug or antibiotic resistance that were significantly different from the placebo in faecal samples after the use of antibiotics. Proportions of KOs in black significantly increased, while KOs in red – decreased after the exposure to the respective antibiotic.

| Antibiotic    | KO ID  | Description                                                                                                                                                                                              | P value* |
|---------------|--------|----------------------------------------------------------------------------------------------------------------------------------------------------------------------------------------------------------|----------|
| Clindamycin   | K00012 | <i>ugd</i> , M00671 Polycationic antibiotics resistance, <i>arn</i> lipopolysaccharide (LPS) modification operon                                                                                         | 0.046    |
|               | K07552 | <i>bcr</i> , MFS transporter, DHA1 family, bicyclomycin/chloramphenicol resistance protein                                                                                                               | 0.023    |
|               | K08641 | <i>vanX</i> , M00651 Vancomycin resistance, VanB type                                                                                                                                                    | 0.037    |
| Ciprofloxacin | K03543 | <i>emrA</i> , multidrug resistance protein A                                                                                                                                                             | 0.027    |
|               | K00897 | E2.7.1.95 kanamycin kinase, M00640 Aminoglycoside antibiotics resistance                                                                                                                                 | 0.03     |
|               | K03446 | <i>emrB</i> , MFS transporter, DHA2 family, multidrug resistance protein B                                                                                                                               | 0.009    |
|               | K05515 | <i>mrdA</i> , penicillin-binding protein 2, ko00312 beta-Lactam resistance, M00626 beta-Lactam resistance, penicillin-binding protein variants                                                           | 0.016    |
|               | K13888 | <i>macA</i> , macrolide-specific efflux protein MacA                                                                                                                                                     | 0.021    |
| Minocycline   | K03543 | <i>emrA</i> , multidrug resistance protein A                                                                                                                                                             | 0.047    |
|               | K08223 | <i>fsr</i> , MFS transporter, FSR family, fosmidomycin resistance protein                                                                                                                                | 0.043    |
|               | K12340 | <i>tolC</i> , outer membrane channel protein, ko00312 beta-Lactam resistance, M00646 Multidrug resistance, efflux pump AcrAD-TolC, M00647 Multidrug resistance, efflux pump MexAB-OprM/SmeDEF/AcrAB-TolC | 0.047    |
|               | K07576 | metallo-beta-lactamase family protein                                                                                                                                                                    | 0.041    |
| Amoxicillin   | K00012 | <i>ugd</i> , M00671 Polycationic antibiotics resistance, <i>arn</i> lipopolysaccharide (LPS) modification operon                                                                                         | 0.01     |
|               | K03296 | multidrug (acriflavin, doxorubicin, ethidium,                                                                                                                                                            | 0.001    |

|  |        |                                                                                                                                                                                                                                                        |       |
|--|--------|--------------------------------------------------------------------------------------------------------------------------------------------------------------------------------------------------------------------------------------------------------|-------|
|  |        | rhodamine 6G, SDS, deoxycholate) efflux pump                                                                                                                                                                                                           |       |
|  | K03327 | <i>TC.MATE, SLC47A, norM, mdtK, dinF, multidrug resistance protein, MATE family</i>                                                                                                                                                                    | 0.039 |
|  | K03543 | <i>emrA, multidrug resistance protein A</i>                                                                                                                                                                                                            | 0.025 |
|  | K03585 | <i>acrA, mexA, adeI, smeD, membrane fusion protein, ko00312 beta-Lactam resistance, M00646 Multidrug resistance, efflux pump AcrAD-TolC, M00647 Multidrug resistance, efflux pump MexAB-OprM/SmeDEF/AcrAB-TolC</i>                                     | 0.015 |
|  | K05595 | <i>marC, multiple antibiotic resistance protein</i>                                                                                                                                                                                                    | 0.012 |
|  | K08169 | <i>yebQ, MFS transporter, DHA2 family, multidrug resistance protein</i>                                                                                                                                                                                | 0.036 |
|  | K08223 | <i>fsr, MFS transporter, FSR family, fosmidomycin resistance protein</i>                                                                                                                                                                               | 0.013 |
|  | K12340 | <i>tolC, outer membrane channel protein, ko00312 beta-Lactam resistance, M00646 Multidrug resistance, efflux pump AcrAD-TolC, M00647 Multidrug resistance, efflux pump MexAB-OprM/SmeDEF/AcrAB-TolC</i>                                                | 0.012 |
|  | K02547 | <i>mecR1, methicillin resistance protein, ko00312 beta-Lactam resistance, M00625 Methicillin resistance</i>                                                                                                                                            | 0.002 |
|  | K03712 | <i>marR, MarR family transcriptional regulator, multiple antibiotic resistance protein MarR</i>                                                                                                                                                        | 0.002 |
|  | K07260 | <i>vanY, D-alanyl-D-alanine carboxypeptidase [EC:3.4.16.4], ko00550 Peptidoglycan biosynthesis, M00651 Vancomycin resistance, VanB type, ko02020 Two-component system, M00652 Vancomycin resistance, VanE type</i>                                     | 0.038 |
|  | K10012 | <i>arnC, pmrF, undecaprenyl-phosphate 4-deoxy-4-formamido-L-arabinose transferase [EC:2.4.2.53], ko00520 Amino sugar and nucleotide sugar metabolism, M00671 Polycationic antibiotics resistance, arn lipopolysaccharide (LPS) modification operon</i> | 0.006 |

\* - P value after Storey FDR correction for multiple comparisons
