# Supplementary material for: Same Exposure but Two Radically Different Responses to Antibiotics: Resilience of the Salivary Microbiome versus Long-Term Microbial Shifts in Feces
Source: PubMed Central journal article supplement — mBio. 2015 Nov 10;6(6):e01693-15. doi: 10.1128/mBio.01693-15 (PMC4659469; doi:10.1128/mbio.01693-15), 2015-11-10
Supplement: mbo005152533st5.pdf [file mbo005152533st5.pdf]

**Table S5.** Antibiotic classes (Class) in the shotgun sequences of selected faecal and salivary samples that showed at least 3-fold change (FC) between baseline and post-antibiotic samples. Minoc – minocycline; Cipro – ciprofloxacin; Clinda – clindamycin; Amox – amoxicillin. Class abbreviations as in ARDB.

| FAECES        |        |      |
|---------------|--------|------|
| Sample        | Class  | FC   |
| <b>3f</b>     | Aac6Ie | 5.5  |
| <b>Minoc</b>  | AdeC   | 3.1  |
| <b>Week 1</b> | Ant6Ia | 3.6  |
|               | cml_e7 | 3.1  |
|               | EmrD   | 14.4 |
|               | ErmF   | 4.9  |
|               | ErmY   | 4.6  |
|               | SmeA   | 3.0  |
|               | str    | 3.5  |
|               | tet40  | 10.4 |
|               | tetPA  | 14.5 |
|               | VanZ   | 4.5  |

|              |          |      |
|--------------|----------|------|
| <b>6f</b>    | Aac6Ie   | 3.9  |
| <b>Cipro</b> | Aph3VIa  | 3.0  |
| <b>Month</b> | Aph6Ic   | 7.6  |
|              | BcrC     | 4.7  |
|              | BL2d_lcr | 3.1  |
|              | BL2d_ox  | 4.4  |
|              | catA10   | 4.6  |
|              | catA14   | 3.1  |
|              | catA7    | 3.2  |
|              | catA8    | 3.8  |
|              | catA9    | 3.1  |
|              | cml_e5   | 4.6  |
|              | dfrA14   | 9.2  |
|              | dfrA17   | 17.3 |
|              | dfrA25   | 3.0  |
|              | dfrA5    | 20.8 |
|              | ErmC     | 3.9  |
|              | MdtM     | 4.1  |
|              | tet33    | 30.2 |
|              | tet40    | 4.0  |
|              | tetPA    | 4.4  |
|              | tetX     | 3.5  |
|              | YkkC     | 3.4  |

| FAECES         |          |     |
|----------------|----------|-----|
| Sample         | Class    | FC  |
| <b>15f</b>     | Aac6Ib   | 3.4 |
| <b>Clinda</b>  | Aac6Ic   | 3.2 |
| <b>Month 1</b> | Aac6If   | 15. |
|                | Aac6Ig   | 4.8 |
|                | aad9     | 6.4 |
|                | aad9Ib   | 28. |
|                | Aph3IIIa | 5.6 |
|                | Aph3IVa  | 6.9 |
|                | Aph3VIa  | 5.6 |
|                | Aph3VIIa | 7.5 |
|                | dfrA5    | 5.5 |
|                | ErmA     | 4.7 |
|                | ErmB     | 240 |
|                | ErmC     | 59. |
|                | ErmF     | 38. |
|                | ErmG     | 4.4 |
|                | ErmH     | 5.8 |
|                | ErmT     | 26. |
|                | ErmY     | 27. |
|                | LnuA     | 19. |
|                | QacB     | 5.2 |

|                |           |     |
|----------------|-----------|-----|
| <b>18f</b>     | Aac6Ie    | 3.4 |
| <b>Cipro</b>   | BL2_kpc   | 3.9 |
| <b>Month 1</b> | BL2_len   | 24. |
|                | BL2a_III  | 7.7 |
|                | BL2b_tem  | 27. |
|                | BL2be_oxy | 3.8 |
|                | BL2be_shv | 9.8 |
|                | BL2c_bro  | 8.7 |
|                | BL2c_pse1 | 5.6 |
|                | BL2e_y56  | 6.2 |
|                | BL2f_nmca | 3.6 |
|                | BL3_imp   | 16. |
|                | BL3_shw   | 3.2 |
|                | cml_e5    | 3.4 |
|                | dfrA1     | 4.7 |
|                | EmrD      | 4.5 |
|                | ErmF      | 4.7 |
|                | ErmY      | 3.1 |
|                | LmrA      | 7.0 |
|                | MexA      | 3.1 |
|                | NorA      | 3.0 |
|                | pur8      | 4.0 |
|                | QacA      | 7.2 |
|                | QacB      | 5.1 |

| FAECES        |           |      |
|---------------|-----------|------|
| Sample        | Class     | FC   |
| <b>32f</b>    | aad9      | 11.7 |
| <b>Amox</b>   | Ant2Ia    | 4.7  |
| <b>Week 1</b> | Aph6Id    | 11.1 |
|               | BL1_acc   | 3.4  |
|               | BL1_ampc  | 6.2  |
|               | BL1_cmy2  | 7.4  |
|               | BL1_ec    | 11.6 |
|               | BL1_fox   | 4.1  |
|               | BL1_och   | 5.9  |
|               | BL1_pao   | 3.9  |
|               | BL1_sm    | 3.6  |
|               | BL2a_okp  | 10.5 |
|               | BL2b_tem  | 8.9  |
|               | BL2d_lcr1 | 4.0  |
|               | BL3_l     | 3.2  |
|               | dfrA14    | 11.4 |
|               | dfrA25    | 13.5 |
|               | dfrA7     | 4.5  |
|               | EmrD      | 5.6  |
|               | MdfA      | 10.9 |
|               | MdtH      | 18.2 |
|               | MdtL      | 11.0 |
|               | MdtM      | 8.1  |
|               | MdtN      | 4.7  |
|               | MdtO      | 5.4  |
|               | MdtP      | 7.6  |
|               | tet31     | 3.1  |
|               | tet34     | 5.3  |
|               | tetA      | 35.5 |
|               | tetB      | 17.1 |
|               | tetC      | 34.5 |
|               | tetJ      | 3.3  |
|               | TolC      | 4.6  |
|               | VgbB      | 7.8  |

| SALIVA        |           |     |
|---------------|-----------|-----|
| Sample        | Class     | FC  |
| <b>4s</b>     | BL2f_sme1 | 4.1 |
| <b>Minoc</b>  | catB1     | 6.9 |
| <b>Week 1</b> | ErmX      | 3.5 |
|               | OprN      | 3.8 |
|               | tet31     | 3.5 |
|               | tet39     | 3.1 |
|               | tetH      | 3.1 |
|               | tetJ      | 3.1 |
|               | VanSB     | 3.0 |

| SALIVA        |         |      |
|---------------|---------|------|
| Sample        | Class   | FC   |
| <b>10s</b>    | Aac3IX  | 10.0 |
| <b>Amox</b>   | Aac6Ic  | 5.9  |
| <b>Week 1</b> | Aac6If  | 5.5  |
|               | AmrA    | 3.1  |
|               | BL2_veb | 4.9  |
|               | catB2   | 3.6  |
|               | catB5   | 3.5  |
|               | dfrA12  | 3.0  |
|               | dfrA16  | 4.1  |
|               | dfrA17  | 4.1  |
|               | dfrA21  | 3.3  |
|               | dfrA24  | 65.6 |
|               | dfrA25  | 4.0  |
|               | ErmA    | 4.1  |
|               | ErmB    | 7.2  |
|               | ErmC    | 9.6  |
|               | ErmG    | 5.1  |
|               | ErmT    | 9.9  |
|               | ErmY    | 3.9  |
|               | LmrP    | 4.7  |
|               | MexC    | 3.3  |
|               | MexW    | 3.2  |
|               | MexX    | 6.3  |
|               | OprN    | 14.0 |
|               | SmeA    | 5.7  |
|               | tet33   | 16.8 |
|               | tetA    | 12.7 |
|               | tetB    | 9.7  |
|               | tetD    | 5.3  |
|               | tetE    | 5.2  |
|               | tetG    | 10.6 |
|               | tetH    | 3.7  |
|               | tetJ    | 6.1  |
|               | tetY    | 7.0  |

| SALIVA        |       |     |
|---------------|-------|-----|
| Sample        | Class | FC  |
| <b>13s</b>    | otrB  | 3.7 |
| <b>Cipro</b>  | pur8  | 3.3 |
| <b>Week 1</b> |       |     |

|               |        |      |
|---------------|--------|------|
| <b>15s</b>    | ErmF   | 19.8 |
| <b>Clinda</b> | ErmG   | 3.2  |
| <b>Week 1</b> | LmrB   | 5.6  |
|               | norM   | 4.8  |
|               | OprM   | 5.1  |
|               | otrB   | 4.1  |
|               | Qac    | 5.9  |
|               | SmeD   | 3.1  |
|               | str    | 3.1  |
|               | tcr3   | 4.3  |
|               | VanXYE | 4.4  |
